# Supplementary material for: Comprehensive Molecular Profiling of NPM1-Mutated Acute Myeloid Leukemia Using RNAseq Approach
Source: MDPI journal article supplement (doi:10.3390/ijms25073631), 2024-03-24
Supplement: s1 [file s1]

Supplementary material

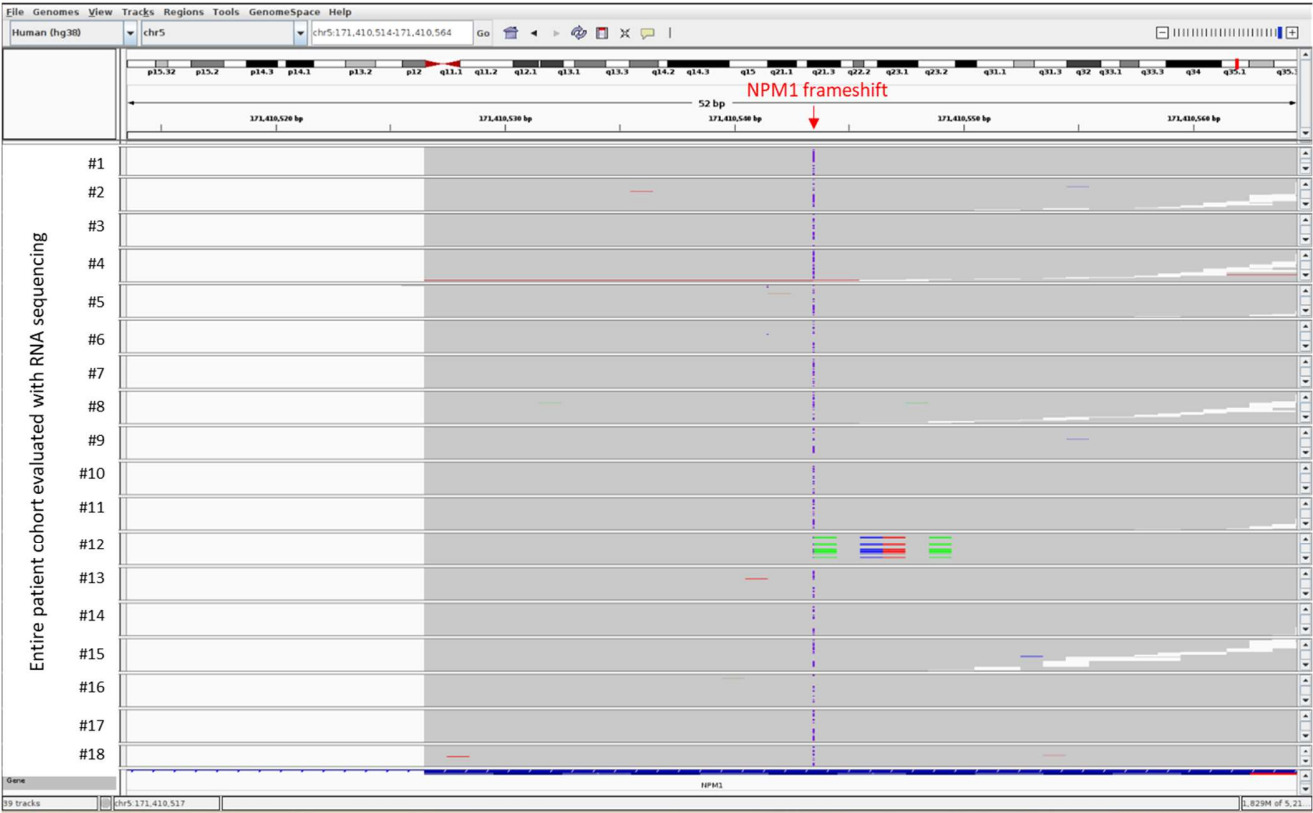

**Supplementary Figure S1. NPM1 genomic alignment.** We observed insertions in all patients but the bioinformatic algorithm called it only 6 times. Red arrow indicated the insertion, in purple in each patient.

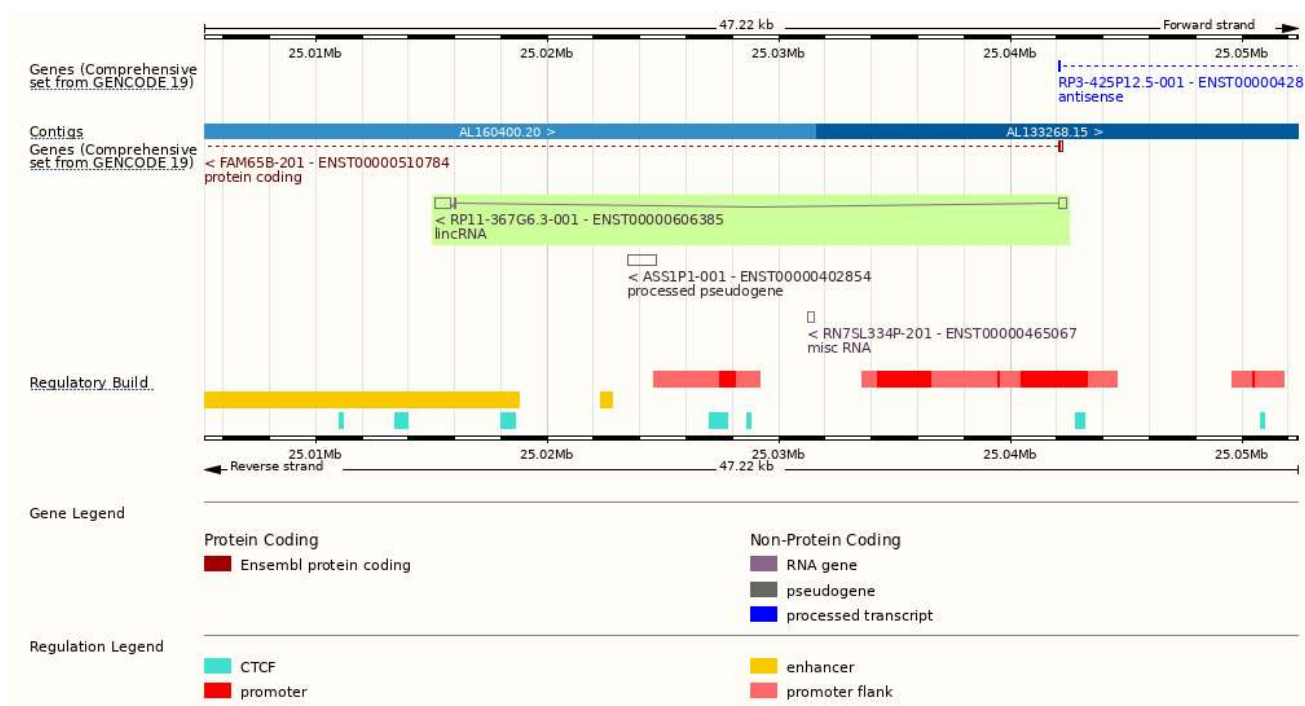

**Supplementary Figure S2. Locus FAM65B gene.** The over-represented transcript alteration in our patients involved a genetic fusion between the first exon on FAB65B and RP11-367G6.3, a long noncoding RNA (green box) that shares the first exon with the FAM65B gene (indicated in garnet).
