# Supplementary material for: Comprehensive Molecular Profiling of NPM1-Mutated Acute Myeloid Leukemia Using RNAseq Approach
Source: Int J Mol Sci. 2024 Mar 24;25(7):3631. doi: 10.3390/ijms25073631 (PMC11011776; doi:10.3390/ijms25073631)
Supplement: Supplementary file 1 [file ijms-25-03631-s001.zip › Supplementary.Tables.xlsx]

## Sheet: Supplementary Table.S1
#ID	Chr	Start	End	Ref	Alt	Gene.refGene	AAChange.refGene	cosmic70	avsnp150	CLNDN	CLNSIG	InterVar_automated	Allelic Frequency (%)
D1	chr1	114716124	114716124	C	G	NRAS	NRAS:NM_002524:exon2:c.G37C:p.G13R	ID=COSM569;OCCURENCE=42(haematopoietic_and_lymphoid_tissue),1(NS),4(stomach),2(biliary_tract),8(large_intestine),1(urinary_tract),1(breast),28(skin),1(endometrium),1(salivary_gland),1(soft_tissue),3(autonomic_ganglia)	rs121434595	Acute_myeloid_leukemia|Melanoma|Medulloblastoma|Large_congenital_melanocytic_nevus|Transitional_cell_carcinoma_of_the_bladder|Multiple_myeloma|Malignant_melanoma_of_skin|Non-Hodgkin_lymphoma|Neoplasm_of_the_large_intestine|Carcinoma_of_colon|Adenocarcinoma_of_stomach|Myelodysplastic_syndrome	Pathogenic/Likely_pathogenic	Likely pathogenic	0.338384
D2	chr11	533838	533838	C	A	HRAS	HRAS:NM_001130442:exon3:c.G218T:p.R73L,HRAS:NM_005343:exon3:c.G218T:p.R73L,HRAS:NM_176795:exon3:c.G218T:p.R73L	.	.	.	.	Uncertain significance	0.964286
D2	chr12	25227341	25227341	T	A	KRAS	KRAS:NM_001369786:exon3:c.A183T:p.Q61H,KRAS:NM_001369787:exon3:c.A183T:p.Q61H,KRAS:NM_004985:exon3:c.A183T:p.Q61H,KRAS:NM_033360:exon3:c.A183T:p.Q61H	ID=COSM555,COSM1146992;OCCURENCE=3(soft_tissue),2(biliary_tract),31(large_intestine),9(pancreas),3(liver),1(breast),1(stomach),2(cervix),2(haematopoietic_and_lymphoid_tissue),18(lung)	rs17851045	Hepatocellular_carcinoma|Acute_myeloid_leukemia|Chronic_lymphocytic_leukemia|Pancreatic_adenocarcinoma|Transitional_cell_carcinoma_of_the_bladder|Multiple_myeloma|Malignant_melanoma_of_skin|Lung_adenocarcinoma|Non-small_cell_lung_cancer|Squamous_cell_lung_carcinoma|Neoplasm_of_the_thyroid_gland|Neoplasm_of_the_large_intestine|Adenocarcinoma_of_stomach|Malignant_neoplasm_of_body_of_uterus	Pathogenic/Likely_pathogenic	Likely pathogenic	0.0603774
D2	chr12	56088107	56088107	A	C	ERBB3	ERBB3:NM_001982:exon7:c.A819C:p.E273D	ID=COSM1586605,COSM941487;OCCURENCE=1(endometrium)	.	.	.	Uncertain significance	0.449438
D2	chr6	41936659	41936659	G	A	CCND3	CCND3:NM_001136125:exon3:c.C395T:p.A132V,CCND3:NM_001136126:exon3:c.C23T:p.A8V,CCND3:NM_001136017:exon4:c.C368T:p.A123V,CCND3:NM_001287427:exon4:c.C461T:p.A154V,CCND3:NM_001287434:exon4:c.C23T:p.A8V,CCND3:NM_001760:exon4:c.C611T:p.A204V	.	.	.	.	Uncertain significance	0.791304
D2	chr7	129206500	129206500	G	A	SMO	SMO:NM_005631:exon6:c.G1177A:p.G393S	.	.	.	.	Likely pathogenic	0.95935
D3	chr11	533838	533838	C	A	HRAS	HRAS:NM_001130442:exon3:c.G218T:p.R73L,HRAS:NM_005343:exon3:c.G218T:p.R73L,HRAS:NM_176795:exon3:c.G218T:p.R73L	.	.	.	.	Uncertain significance	1
D3	chr12	56088865	56088865	A	G	ERBB3	ERBB3:NM_001982:exon9:c.A1106G:p.N369S	.	rs200211366	.	.	Uncertain significance	0.206704
D3	chr5	112839228	112839228	T	A	APC	APC:NM_001127511:exon14:c.T3580A:p.S1194T,APC:NM_001354897:exon15:c.T3664A:p.S1222T,APC:NM_001354899:exon15:c.T3550A:p.S1184T,APC:NM_001354901:exon15:c.T3457A:p.S1153T,APC:NM_001354902:exon15:c.T3361A:p.S1121T,APC:NM_001354905:exon15:c.T3154A:p.S1052T,APC:NM_000038:exon16:c.T3634A:p.S1212T,APC:NM_001354895:exon16:c.T3634A:p.S1212T,APC:NM_001354898:exon16:c.T3559A:p.S1187T,APC:NM_001354900:exon16:…	.	.	.	.	Uncertain significance	0.979798
D4	chr15	90088702	90088702	C	T	IDH2	IDH2:NM_001290114:exon2:c.G29A:p.R10Q,IDH2:NM_001289910:exon4:c.G263A:p.R88Q,IDH2:NM_002168:exon4:c.G419A:p.R140Q	ID=COSM41590;OCCURENCE=417(haematopoietic_and_lymphoid_tissue),1(NS)	rs121913502	Acute_myeloid_leukemia|Multiple_myeloma|Neoplasm_of_the_large_intestine|Squamous_cell_carcinoma_of_the_head_and_neck|D-2-hydroxyglutaric_aciduria_2|Myelodysplastic_syndrome|not_provided	Pathogenic/Likely_pathogenic	Uncertain significance	0.0625
D5	chr12	25245347	25245347	C	T	KRAS	KRAS:NM_001369786:exon2:c.G38A:p.G13D,KRAS:NM_001369787:exon2:c.G38A:p.G13D,KRAS:NM_004985:exon2:c.G38A:p.G13D,KRAS:NM_033360:exon2:c.G38A:p.G13D	ID=COSM1140132,COSM532;OCCURENCE=103(haematopoietic_and_lymphoid_tissue),2(pleura),5(cervix),17(gastrointestinal_tract_(site_indeterminate)),2(peritoneum),118(lung),23(thyroid),1(bone),4(upper_aerodigestive_tract),3(oesophagus),1(central_nervous_system),43(stomach),29(pancreas),3(liver),5(urinary_tract),1(genital_tract),3337(large_intestine),21(biliary_tract),23(prostate),17(breast),3(skin),19(sm…	rs112445441	OCULOECTODERMAL_SYNDROME\x2c_SOMATIC|Acute_myeloid_leukemia|Juvenile_myelomonocytic_leukemia|Non-small_cell_lung_cancer|Neoplasm_of_the_thyroid_gland|Neoplasm_of_ovary|Neoplasm_of_the_large_intestine|Breast_adenocarcinoma|RAS-associated_autoimmune_leukoproliferative_disorder|Inborn_genetic_diseases|not_provided	Pathogenic	Likely pathogenic	0.119149

## Sheet: Supplementary Table.S2
Chr Pos Ref Alt	Type	Representative amino acid change (transcript)	dbSNP	COSMIC ID (haematopoietic_and_lymphoid_tissue (HL), other tumors (O))	CLNSIG	InterVar automated	Cancer (sequencing depth>25)	Leukemia (sequencing depth>25)	Cancer (sequencing depth>100)	Leukemia (sequencing depth>100)
11 108304736 A T	Non-synonymous	ATM p.D1853V (NM_000051)	rs1801673	COSM21628 (1 HL, 1 O)	Likely benign	Conflicting interpretations of pathogenicity	2
11 108317431 A T	Non-synonymous	ATM p.Y2086F (NM_000051)	rs730881380	.	Uncertain significance	Uncertain significance	1		1
11 108331520 T C	Non-synonymous	ATM p.M2531T (NM_000051)	rs587781365	.	Uncertain significance	Conflicting interpretations of pathogenicity	1
20 56386485 A T	Non-synonymous	AURKA p.F31I (NM_003600)	rs2273535	.	Benign	risk factor	2
11 119284996 A G	Non-synonymous	CBL p.M487V (NM_005188)	rs17848896	.	Uncertain significance	Conflicting interpretations of pathogenicity	1	1
12 57750985 C G	Non-synonymous	CDK4 p.V154L (NM_000075)	rs563692823	.	Uncertain significance	Uncertain significance	1
12 12717864 G T	Non-synonymous	CDKN1B p.G9W (NM_004064)	.	.	Uncertain significance	Uncertain significance	1		1
14 95099907 C T	Non-synonymous	DICER1 p.G1360E (NM_001195573)	.	.	Uncertain significance	Uncertain significance	1
2 25234374 G A	Non-synonymous	DNMT3A p.R882H (NM_175629)	rs377577594	COSM1166704,COSM53042 (161 HL)	Uncertain significance	Pathogenic	2	2
2 25234373 C T	Non-synonymous	DNMT3A p.R882H (NM_175629)	rs147001633	COSM52944,COSM442676 (1 O, 410 HL)	Uncertain significance	Conflicting interpretations of pathogenicity	1	1
13 28018492 T C	Non-synonymous	FLT3 p.D839G (NM_004119)	rs991132188	COSM1166729 (2 HL)	Likely pathogenic	Likely pathogenic	1	1
11 67585218 A G	Non-synonymous	GSTP1 p.I105V (NM_000852)	rs1695	.	Benign	drug response	9		9
15 90088702 C T	Non-synonymous	IDH2 p.R140Q (NM_002168)	rs121913502	COSM41590 (417 HL, 1 O)	Uncertain significance	Pathogenic/Likely pathogenic	1	1	1	1
2 47410166 G A	Non-synonymous	MSH2 p.V81I (NM_001258281)	rs773125415	.	Uncertain significance	Uncertain significance	1		1
1 11796321 G A	Non-synonymous	MTHFR p.A263V (NM_001330358)	rs1801133	.	Benign	drug response	9		1
5 7870860 A G	Non-synonymous	MTRR p.I22M (NM_001364440)	rs1801394	.	Benign	drug response	11
1 45332190 C A	Non-synonymous	MUTYH p.E275D (NM_001048174)	rs863224700	.	Uncertain significance	Uncertain significance	1
16 69711242 G A	Non-synonymous	NQO1 p.P187S (NM_000903)	rs1800566	.	Benign	drug response	1	1
1 114716126 C T	Non-synonymous	NRAS p.G12D (NM_002524)	rs121913237	COSM564 (136 O,324 HL)	Likely pathogenic	Pathogenic	1	1	1	1
1 114716124 C G	Non-synonymous	NRAS p.G13R (NM_002524)	rs121434595	COSM569 (42(HL),51 O)	Likely pathogenic	Pathogenic/Likely pathogenic	1	1
7 5995556 C A	Non-synonymous	PMS2 pR294L (NM_001322006)	.	.	Uncertain significance	Uncertain significance	1
19 50399016 G C	Non-synonymous	POLD1 p.E55D (NM_001308632)	.	.	Likely benign	Uncertain significance	1
19 50402013 C T	Non-synonymous	POLD1 p.E55D (NM_001308632)	rs144770820	.	Uncertain significance	Uncertain significance	1		1
15 90970444 T C	Non-synonymous	PRC1 pY511C (NM_003981)	rs12911192	.	Benign	Uncertain significance	1
12 112450395 C T	Non-synonymous	PTPN11 p.A72V (NM_001330437)	rs121918454	COSM13015 (42 HL)	Likely pathogenic	Conflicting interpretations of pathogenicity	1	1	1	1
12 112450394 G A	Non-synonymous	PTPN11 p.A72T (NM_001330437)	rs121918453	COSM13014 (5 O, 27 HL)	Likely pathogenic	Pathogenic/Likely pathogenic	1	1	1	1
12 112450406 G A	Non-synonymous	PTPN11 p.E76K (NM_001330437)	rs121918464	COSM13000 (2 O, 83 HL)	Likely pathogenic	Conflicting interpretations of pathogenicity	1	1	1	1
11 48123823 A C	Non-synonymous	PTPRJ p.Q276P (NM_001098503)	rs1566734	.	Benign	Pathogenic	5		2
5 132609190 G A	Non-synonymous	RAD50 p.G968E (NM_005732)	rs199895166	.	Uncertain significance	Uncertain significance	1
1 182585422 C T	Non-synonymous	RNASEL p.R462Q (NM_021133)	rs486907	.	Benign	risk factor	6
17 18328782 G A	Non-synonymous	SHMT1 p.L474F (NM_004169)	rs1979277	.	Benign	Uncertain significance	2
21 45537880 T C	Non-synonymous	SLC19A1 p.H27R (NM_001205206)	rs1051266	.	Benign	Uncertain significance	10
17 7676154 G C	Non-synonymous	TP53 p.P72R (NM_000546)	rs1042522	COSM250061 (5 O)	.	drug response	14		5
6 96552610 C G	Non-synonymous	UFL1 p.P705R (NM_015323)	rs199880163	.	Uncertain significance	Uncertain significance	1
8 89982736 AA -	frameshift deletion	NBN p.S53Cfs*9 (NM_002485)	rs767454740	.	criteria_provided\x2c_multiple_submitters\x2c_no_conflicts	Pathogenic/Likely_pathogenic	1	1
1 85267829 - A	frameshift insertion	BCL10 p.S167Ffs*3 (NM_003921)	rs387906350	.	no_assertion_criteria_provided	Pathogenic	14		1
11 108293436 - A	frameshift insertion	ATM p.I1581Nfs*5 (NM_000051)	rs864622164	.	criteria_provided\x2c_conflicting_interpretations	Conflicting_interpretations_of_pathogenicity	1
11 108307928 - A	frameshift insertion	ATM p.S1905Ifs*25 (NM_000051)	rs1040777064	.	criteria_provided\x2c_multiple_submitters\x2c_no_conflicts	Pathogenic/Likely_pathogenic	1
11 108326152 - A	frameshift insertion	ATM p.E2304Gfs*69 (NM_000051)	rs773570504	COSM1561119,COSM301720 (2 O)	criteria_provided\x2c_multiple_submitters\x2c_no_conflicts	Pathogenic	2		1
13 32332465 - A	frameshift insertion	BRCA2 p.I332Nfs*4 (NM_000059)	rs397508066	.	reviewed_by_expert_panel	Pathogenic	2
13 32336524 - A	frameshift insertion	BRCA2 p.V726Sfs*25 (NM_000059)	rs276174819	.	reviewed_by_expert_panel	Pathogenic	1
13 32336936 - A	frameshift insertion	BRCA2 p.N863Kfs*18 (NM_000059)	rs80359335	.	reviewed_by_expert_panel	Pathogenic	6
13 32338208 - A	frameshift insertion	BRCA2 p.N1287Kfs*2 (NM_000059)	rs80359409	.	reviewed_by_expert_panel	Pathogenic	1
13 32338942 - A	frameshift insertion	BRCA2 p.V1532Sfs*2 (NM_000059)	rs397507732	.	reviewed_by_expert_panel	Pathogenic	1
13 32339421 - A	frameshift insertion	BRCA2 p.W1692Mfs*3 (NM_000059)	rs80359480	.	reviewed_by_expert_panel	Pathogenic	2
13 32339699 - A	frameshift insertion	BRCA2 p.N1784Kfs*3 (NM_000059)	rs80359508	.	reviewed_by_expert_panel	Pathogenic	2
14 75048354 - T	frameshift insertion	MLH3 p.N434Kfs*4 (NM_001040108)	.	.	criteria_provided\x2c_single_submitter	Uncertain_significance	1
14 95096461 - T	frameshift insertion	DICER1 p.S1487Ifs*5 (NM_001195573)	.	.	criteria_provided\x2c_multiple_submitters\x2c_no_conflicts	Pathogenic/Likely_pathogenic	2
14 95099900 - T	frameshift insertion	DICER1 p.K1363Efs*13 (NM_001195573)	.	.	criteria_provided\x2c_single_submitter	Pathogenic	2
17 61683605 - T	frameshift insertion	BRIP1 p.N1147Kfs*2 (NM_032043)	rs753683450	COSM1384995,COSM1384994(1 O)	criteria_provided\x2c_conflicting_interpretations	Conflicting_interpretations_of_pathogenicity	1
17 61683785 - T	frameshift insertion	BRIP1 p.N1087Kfs*4 (NM_032043)	rs771654971	.	criteria_provided\x2c_multiple_submitters\x2c_no_conflicts	Likely_pathogenic	1
18 51047193 - A	frameshift insertion	SMAD4 p.D52Rfs*2 (NM_005359)	rs786203560	.	criteria_provided\x2c_multiple_submitters\x2c_no_conflicts	Pathogenic	6		4
19 33302346 - G	frameshift insertion	CEBPA p.H59Afs*84 (NM_001287424)	rs137852729	COSM18922 (31 HL)	criteria_provided\x2c_single_submitter	Pathogenic	1	1
2 214781250 - T	frameshift insertion	BARD1 p.K190Efs*5 NM_001282543	rs587780033	COSM1245949,COSM1245950 (1 O)	criteria_provided\x2c_multiple_submitters\x2c_no_conflicts	Pathogenic	6
2 214781360 - T	frameshift insertion	BARD1 p.D153Rfs*10 NM_001282543	rs746325928	.	criteria_provided\x2c_single_submitter	Pathogenic	1		1
2 47412448 - A	frameshift insertion	MSH2 p.A230Sfs*2 (NM_000251)	rs63750364	.	reviewed_by_expert_panel	Pathogenic	1
2 47798717 - A	frameshift insertion	MSH6 p.R118Tfs*8 (NM_001281492)	rs1060502928	.	criteria_provided\x2c_multiple_submitters\x2c_no_conflicts	Pathogenic/Likely_pathogenic	1		1
2 47800056 - A	frameshift insertion	MSH6 p.C564Mfs*4 (NM_001281492)	rs267608083	.	criteria_provided\x2c_multiple_submitters\x2c_no_conflicts	Pathogenic	1
2 47800667 - A	frameshift insertion	MSH6 p.N767Kfs*3 (NM_001281492)	rs1064794300	.	criteria_provided\x2c_multiple_submitters\x2c_no_conflicts	Pathogenic	12		8
2 47803552 - T	frameshift insertion	MSH6 p.G975Wfs*3 (NM_001281492)	rs587778533	COSM1408313(1 O)	criteria_provided\x2c_multiple_submitters\x2c_no_conflicts	Pathogenic	15		10
5 171410539 - TCTG	frameshift insertion	NPM1 p.W288Cfs*12 (NM_001355006)	rs587776806	COSM158604(27 HL)	criteria_provided\x2c_single_submitter	Pathogenic	5	5	4	4
5 171410540 - CTGC	frameshift insertion	NPM1 p.W288Cfs*12 (NM_001355006)	rs587776806	COSM28937(7 HL)	no_assertion_criteria_provided	Pathogenic	1	1	1	1
5 171410541 - TGCA	frameshift insertion	NPM1 p.W288Cfs*12 (NM_001355006)	rs587776806	COSM158600(2 HL)	no_assertion_criteria_provided	Pathogenic	1	1	1	1
8 89953437 - T	frameshift insertion	NBN p.R551Kfs*5 (NM_002485)	rs766044684	.	criteria_provided\x2c_multiple_submitters\x2c_no_conflicts	Pathogenic	10		10
14 103699590 T C	intronic	.	rs1799796	.	no_assertion_criteria_provided	risk_factor	4
1 17044825 G A	stopgain	SDHB p.R46X (NM_003000)	rs74315370	COSM677083(1 O)	criteria_provided\x2c_multiple_submitters\x2c_no_conflicts	Pathogenic	1
1 193135542 C T	stopgain	CDC73 p.R126X (NM_024529)	.	.	criteria_provided\x2c_single_submitter	Pathogenic	1
15 90981967 C T	synonymous SNV	PRC1 p.T53T (NM_001267580)	rs2301826	.	no_assertion_criteria_provided	Uncertain_significance	5		1
17 5223379 A G	synonymous SNV	SCIMP p.G33G (NM_001271842)	rs2641256	.	no_assertion_criteria_provided	Uncertain_significance	5		1
22 41152313 C T	synonymous SNV	EP300 p.T1009T (NM_001362843)	rs150498069	.	criteria_provided\x2c_conflicting_interpretations	Conflicting_interpretations_of_pathogenicity	1		1
4 73076961 C T	synonymous SNV	ANKRD17 p.T2326T (NM_198889)	rs2306058	.	criteria_provided\x2c_single_submitter	association	3
6 26031640 G A	UTR3	.	rs2213284	.	no_assertion_criteria_provided	Uncertain_significance	14		13
9 21968200 C G	UTR3	.	rs11515	COSM14251 (1 O)	no_assertion_criteria_provided	Uncertain_significance	4
